# Supplementary material for: Infrared and visible image fusion algorithm based on gradient attention residuals dense block
Source: PeerJ Comput Sci. 2024 Nov 28;10:e2569. doi: 10.7717/peerj-cs.2569 (PMC11622899; doi:10.7717/peerj-cs.2569)
Supplement: Supplemental Information 1 — There are 8 sub-tables in total, and each sub-table is an evaluation index. The first row of each table is the method name, and the value of the data in each column is the result of applying the method to the 42 images in the TNO dataset. The original experimental data show that our proposed method has achieved excellent results in AG, EN, SF, MI, and SD. [file peerj-cs-10-2569-s001.xlsx]

## Sheet: SD
PMGI	DenseFuse	FusionGAN	RFN-Nest	swinfuse	U2Fusion	ours
28.0179	23.2679	25.1883	26.2629	53.1762	29.7825	56.0475
33.6511	29.0423	24.6532	35.2379	64.7298	37.8178	52.0362
33.1489	24.3411	22.4926	35.5496	49.7819	32.2912	52.6786
28.138	20.0232	19.71	33.2323	40.5392	31.4414	53.1601
46.5255	28.797	29.2063	55.5809	62.9109	52.0289	62.6961
28.253	18.5755	16.1508	32.0048	34.0576	34.8592	44.5494
45.6702	39.3653	43.0613	42.9901	75.2929	46.8114	49.9359
29.2974	31.3753	24.2183	34.6556	31.6653	32.7977	40.0566
43.8653	29.3175	22.6811	39.7028	48.3972	37.982	47.0174
41.7184	27.7328	27.8571	41.1625	46.5144	37.4083	46.884
41.3338	27.8934	36.4452	35.5317	68.6776	38.0724	37.1193
43.4464	30.3855	20.9171	56.3813	68.3791	53.8295	67.9713
25.0584	10.4445	18.6743	19.0247	21.8937	20.129	42.4745
35.7617	37.2008	31.4827	36.6611	48.7444	41.296	38.8511
38.5779	29.1957	33.2845	42.9577	53.2946	45.5133	62.3444
25.6735	25.5784	20.2453	30.3163	52.8168	36.6662	57.5393
43.8009	31.5358	34.947	44.1193	58.6126	45.294	64.6585
28.7775	27.103	22.7669	31.4631	55.012	39.4783	59.8414
42.6135	23.5511	39.2002	40.5094	66.8595	36.2927	60.2047
37.9474	26.2262	37.6912	34.2878	63.9324	38.5208	56.6458
32.8965	25.5149	26.3964	31.7618	49.5159	33.7122	53.2606
55.2194	28.2849	46.5938	51.3797	55.2948	51.1144	61.7842
47.23	22.4094	42.5348	45.7429	43.947	48.9717	60.7356
48.6716	23.1013	47.176	45.9376	54.7479	48.1601	59.0385
50.5295	23.243	48.0853	42.8517	47.9587	42.7348	57.3023
42.1066	23.4533	44.6833	36.8268	57.6499	38.6012	67.0582
51.5587	25.1291	39.4251	47.6534	51.9161	48.7546	59.4995
33.9397	13.7038	28.5872	30.6996	31.2331	33.0414	57.6989
28.8239	10.8133	26.5416	24.8665	29.2039	19.0262	50.5168
40.3406	26.4312	30.8869	35.0546	50.0523	32.624	54.4354
31.8905	13.0964	22.9676	31.4331	36.3618	35.3707	58.2023
66.0183	52.1516	51.9331	57.1234	92.8465	57.8607	53.2883
42.9359	21.3894	39.9955	36.4949	34.1935	38.9916	59.9899
35.5876	13.5028	27.8197	36.8352	39.7777	32.2143	60.6974
34.6321	22.8753	25.8331	35.1201	41.6981	37.2684	45.7259
25.3104	12.5646	13.814	26.7657	31.9987	23.6985	59.1572
37.8803	9.65807	31.2194	29.5684	30.9247	23.8561	60.6206
33.9567	24.1209	30.1956	31.8335	49.8665	32.0436	57.0332
34.7983	26.6505	29.2254	33.9565	53.0041	34.5451	59.0409
34.1015	34.2317	27.5149	38.6382	76.2993	44.1671	65.2278
40.0706	27.3781	34.9363	31.462	48.6727	34.0285	55.5414
27.85	20.8168	20.615	20.0359	27.0028	24.1718	40.9103

## Sheet: MI
PMGI	DenseFuse	FusionGAN	RFN-Nest	swinfuse	U2Fusion	ours
1.91284	2.13384	1.95481	1.7466	2.20569	1.83519	1.36745
1.65507	1.89855	1.9074	1.54776	2.28285	1.67409	1.72676
2.17565	2.40978	2.2442	2.2212	2.89269	2.32538	1.39836
1.52451	2.21027	1.68268	2.16013	2.43619	2.18003	1.45575
2.37474	2.68247	1.93637	2.59547	3.38864	2.42558	3.40773
1.06294	1.12624	1.24828	1.1957	1.29437	1.2973	2.66463
2.8143	3.1756	2.48238	2.70505	2.25814	2.65003	2.42999
3.27492	4.30724	2.84104	3.70049	3.65654	3.30535	4.37184
2.64104	1.88874	1.5649	1.62347	1.61782	1.48137	2.1517
2.28388	1.87875	1.66904	1.62236	1.90075	1.62616	2.78566
2.24605	2.26598	2.38032	2.41292	3.00689	2.09612	2.93895
3.08259	2.63414	2.37121	2.61318	2.88475	2.54853	2.25828
0.819764	0.666587	1.23886	0.653621	0.740791	0.816575	1.32136
3.43298	3.35655	3.21755	2.9592	3.15384	2.88257	3.52984
2.17439	2.10495	2.51735	2.08889	2.16257	1.96969	3.35251
1.67697	2.12904	1.74681	2.12468	2.55031	2.20007	3.26731
2.56188	2.22712	2.87521	2.2184	2.31276	2.06757	3.21843
1.71835	2.15411	1.95748	2.10187	2.68263	2.38766	3.2161
3.01978	2.82055	3.09488	2.86873	3.42651	2.34661	3.609
2.9256	2.68214	2.73222	2.65576	2.88872	2.63883	3.49146
1.39748	1.56372	1.68742	1.44796	1.82859	1.66835	1.48003
2.94118	2.53362	2.78218	2.57432	2.62305	2.30635	3.5052
2.52005	1.89473	2.58135	1.89052	2.18629	1.60454	2.88714
2.58144	2.21654	2.87451	2.24966	2.62307	2.1456	3.74794
2.51941	1.9953	2.54997	1.8639	2.08748	1.6468	2.95306
3.09176	2.67426	3.02654	2.71052	2.99817	2.47668	3.31942
2.56681	2.15673	2.57781	2.29299	2.38223	2.03264	3.34991
2.77594	1.93924	3.07531	2.10023	1.92011	1.78824	3.60558
1.91652	1.32716	2.58786	1.64181	1.76869	0.984811	1.88825
2.60286	1.81347	2.32959	1.90421	1.92989	1.61342	2.51565
1.72684	1.57626	2.28798	1.49395	1.81558	1.73314	1.61038
4.44397	4.41876	3.77588	3.84244	4.031	3.54954	4.1425
2.52085	2.00084	2.70354	1.86883	1.91652	1.52312	2.72523
1.66204	1.4294	1.79478	1.5484	2.16224	1.58205	1.0839
2.09431	1.59889	2.4401	1.69901	1.78624	1.68075	3.38804
1.91095	1.65198	1.48145	1.68496	1.99829	1.74858	1.71452
2.13081	2.19495	2.19281	2.06628	4.05732	1.74803	1.62526
1.87152	2.02299	2.14373	1.91228	2.38721	1.98004	1.60242
1.62454	1.9002	1.92391	1.56561	2.30646	1.66266	1.88338
2.26043	2.41172	1.90263	1.93623	2.53203	1.99644	1.7715
2.9541	2.58222	2.97424	2.66782	3.04642	2.25314	2.39791
3.29563	2.52186	2.72309	2.19607	1.50366	1.94916	2.72089

## Sheet: VIF
PMGI	DenseFuse	FusionGAN	RFN-Nest	swinfuse	U2Fusion	ours
0.535166	0.50989	0.428886	0.50111	0.623459	0.530196	0.350298
0.499436	0.505709	0.39525	0.448349	0.618928	0.487909	0.466547
0.627767	0.584602	0.457717	0.551244	0.789751	0.594904	0.454886
0.768653	0.692974	0.587816	0.633572	0.913333	0.717583	0.493257
0.48005	0.513677	0.376045	0.475633	0.628662	0.482969	0.590168
0.37476	0.39555	0.245908	0.476779	0.440701	0.431815	0.619568
0.653658	0.652324	0.409558	0.457276	0.641153	0.611678	0.495182
0.790304	0.952122	0.629814	0.80684	0.605473	0.768735	0.972393
0.611419	0.574391	0.425613	0.522643	0.616742	0.589719	0.688872
0.540424	0.514348	0.360233	0.38399	0.556944	0.492192	0.525697
0.498133	0.521914	0.360517	0.543204	0.564295	0.519989	0.651466
0.861323	0.662479	0.53383	0.851387	0.854482	0.827782	0.522071
0.524731	0.470564	0.389583	0.483981	0.530357	0.505787	0.55078
0.820805	0.848477	0.539424	0.668138	0.772346	0.786976	0.774696
0.562882	0.519619	0.306258	0.519058	0.533033	0.570907	0.787286
0.55517	0.576662	0.34415	0.530062	0.679008	0.595679	0.763194
0.577056	0.537306	0.277061	0.51643	0.548943	0.575896	0.732144
0.567655	0.575	0.353118	0.522572	0.682528	0.594319	0.768379
0.632566	0.553649	0.413919	0.519995	0.745684	0.646964	0.687325
0.674976	0.600128	0.429355	0.533901	0.770247	0.67489	0.711968
0.39776	0.475448	0.290714	0.477984	0.582866	0.487578	0.340851
0.776837	0.667463	0.470803	0.639328	0.794768	0.780221	0.750355
0.71449	0.588455	0.425397	0.636868	0.737368	0.691728	0.702028
0.821036	0.681181	0.555109	0.719476	0.868977	0.763397	0.849101
0.777663	0.661094	0.491155	0.635108	0.753665	0.712639	0.718361
0.685562	0.612319	0.415384	0.541406	0.813623	0.721049	0.597147
0.787784	0.664724	0.455073	0.648361	0.82227	0.772069	0.760051
0.69115	0.517047	0.33703	0.585419	0.696915	0.758473	0.854318
0.518271	0.436861	0.369942	0.452166	0.634382	0.555399	0.390892
0.56691	0.49909	0.398892	0.499763	0.56589	0.478593	0.404706
0.603426	0.45992	0.339899	0.46827	0.625178	0.581273	0.383372
0.70807	0.715247	0.499897	0.546497	0.624477	0.675005	0.835158
0.821117	0.659283	0.509849	0.725596	0.693525	0.836896	0.907212
0.679119	0.563338	0.456266	0.619447	0.691783	0.633617	0.36334
0.470539	0.43869	0.325353	0.475	0.485993	0.475394	0.699707
0.606214	0.504832	0.30121	0.547953	0.663818	0.58767	0.421154
0.935645	0.5444	0.703524	0.780566	0.88249	0.818935	0.482547
0.556604	0.547799	0.474334	0.573333	0.66555	0.597132	0.406531
0.502715	0.492991	0.397525	0.499993	0.574337	0.5062	0.373151
0.501393	0.529234	0.386741	0.497551	0.547027	0.535976	0.397463
0.452527	0.453287	0.340698	0.402055	0.468394	0.414072	0.326464
0.768227	0.695515	0.51705	0.572342	0.503686	0.603332	0.787741

## Sheet: AG
PMGI	DenseFuse	FusionGAN	RFN-Nest	swinfuse	U2Fusion	ours
3.23231	2.59625	2.54377	2.50131	4.96207	4.39094	10.4304
4.10156	3.31593	2.74033	2.95699	7.04639	5.74911	9.57459
3.35508	2.4721	2.34833	2.69287	4.71927	4.4901	9.57217
4.09318	2.72633	2.55898	3.27025	5.51295	5.58923	8.95777
8.92229	5.10364	4.68403	7.43367	10.2954	11.2713	9.47749
5.02162	3.25065	2.22421	4.38667	5.38186	7.67639	6.85678
3.51405	3.15097	2.67709	2.34333	6.45599	4.60242	5.9977
6.89705	6.11527	4.03702	5.23374	4.83656	7.27085	7.66647
4.05425	2.98634	3.26404	3.31779	5.97698	6.11756	11.5933
4.30872	3.42425	3.81831	3.56984	7.17776	6.47661	5.9325
3.59496	2.83866	3.02277	2.88342	6.33555	5.28606	4.70554
2.76452	1.40445	1.37086	2.40965	2.80645	3.27039	5.09137
4.98242	2.40561	3.06118	3.22882	5.04402	5.42937	10.2732
2.84688	2.51213	1.76635	1.65992	3.11485	3.68483	3.42641
3.09199	2.1964	1.64643	1.80067	3.20296	4.29214	3.94286
3.16142	2.82941	1.80456	2.18144	5.05194	4.88649	5.58668
3.21847	2.19603	1.5335	1.82223	3.45436	4.15131	3.94779
3.09611	2.52651	1.68605	2.16443	4.48202	4.41591	5.37696
1.92486	1.56073	1.72897	1.53338	3.90786	3.37991	3.01366
2.23798	1.76165	2.18013	1.43297	4.19276	3.35765	3.20547
4.15647	3.1922	2.77615	3.19062	6.17141	5.85804	10.0853
2.41043	1.63516	2.06249	1.6902	3.52123	3.97319	3.2884
2.51697	1.65891	2.14703	2.18788	3.3709	4.68428	4.27783
2.81893	1.67192	2.51795	2.22812	3.6591	4.4846	3.41633
3.47468	2.08378	2.91061	2.66298	4.44436	5.0315	4.12155
2.08676	1.68405	2.05796	1.46419	4.55965	3.68759	3.32994
2.68596	1.75629	2.06983	1.95615	3.80854	4.4812	3.35044
2.18276	1.36522	1.07052	1.38991	2.64733	3.99569	2.96742
2.15515	1.49902	1.39391	1.66979	3.93615	3.83492	9.09939
3.03955	2.63107	2.62762	2.53194	4.98869	4.8269	7.10396
3.496	1.78631	1.43168	2.19035	4.33124	5.88472	9.9397
3.25394	2.5992	2.28657	2.08653	3.71322	3.9304	3.89744
2.07178	1.39898	1.77352	1.70184	2.12536	3.57441	3.90217
5.54334	2.00458	3.43827	3.58132	5.78031	6.38766	15.5527
4.28622	2.8484	2.53135	3.29304	4.91935	5.83256	5.39963
3.7438	1.93304	1.5499	2.31678	4.74758	4.76003	9.14501
4.09636	1.29003	3.0375	2.76658	3.7974	4.66462	10.4153
2.86821	2.22964	2.22028	2.41031	4.35739	4.17706	8.50535
4.35681	3.34333	3.21384	3.60288	5.98201	5.67061	10.4833
3.44316	2.89891	2.29185	2.60918	5.57637	5.32863	10.2479
5.2088	4.42924	3.91549	4.24629	6.76795	7.6639	12.6385
2.80452	1.90018	1.66456	1.51016	2.04421	2.45655	3.85596

## Sheet: SCD
PMGI	DenseFuse	FusionGAN	RFN-Nest	swinfuse	U2Fusion	ours
1.87005	1.76523	1.72242	1.80757	1.88383	1.82073	1.41182
1.61116	1.44762	1.01991	1.63516	1.84619	1.60655	1.67087
1.82765	1.62493	1.43091	1.84856	1.9763	1.71588	1.1579
1.8416	1.59375	1.3836	1.86603	1.98305	1.79208	1.5217
1.91177	1.66903	1.62666	1.93946	1.82836	1.88616	1.82432
1.8633	1.64738	1.45444	1.91829	1.91227	1.90891	1.52494
1.42179	1.4563	1.00744	1.48808	1.55509	1.62971	1.56444
0.372046	0.955638	-0.179618	1.13856	0.479162	0.847582	1.47563
1.16589	1.29196	0.904807	1.62458	1.63462	1.59332	1.07977
1.80135	1.64221	1.43383	1.85434	1.7192	1.82078	1.17035
1.76708	1.49258	1.40764	1.75586	1.82006	1.7878	1.43778
1.7418	1.38056	1.276	1.95031	1.82597	1.85477	1.65253
1.84453	1.68909	1.39002	1.93386	1.98996	1.93646	1.29422
0.415202	1.01879	0.0731494	0.979608	1.30076	1.20639	0.999806
1.75766	1.51092	1.38295	1.83693	1.89696	1.85067	1.75283
1.75611	1.68014	1.52441	1.71798	1.90746	1.78993	1.71479
1.78806	1.54134	1.51918	1.8251	1.8974	1.80567	1.73076
1.69618	1.5997	1.48192	1.67128	1.93751	1.77768	1.81757
1.97846	1.88775	1.86926	1.97243	1.80904	1.97387	1.22651
1.90975	1.76416	1.76491	1.88162	1.93087	1.91792	1.58729
1.71845	1.47941	1.09822	1.6803	1.95045	1.64615	1.61245
1.94946	1.79344	1.72177	1.97995	1.92352	1.9777	0.798109
1.97225	1.81952	1.76205	1.9803	1.899	1.95934	1.20814
1.94424	1.73086	1.71141	1.98595	1.92743	1.96841	1.2366
1.96187	1.80222	1.7784	1.97896	1.93456	1.97142	1.30067
1.97923	1.89041	1.8492	1.96983	1.92292	1.98038	1.43819
1.94758	1.76812	1.67641	1.98239	1.94186	1.98007	1.04391
1.9491	1.90916	1.90049	1.98378	1.96535	1.9692	0.957933
1.96336	1.9378	1.88923	1.98012	1.96704	1.98624	1.51383
1.81348	1.63236	1.47148	1.82655	1.90378	1.76607	1.75845
1.9177	1.87385	1.83956	1.95181	1.90489	1.89755	1.30086
0.788004	1.11813	0.728495	1.20602	1.64558	1.26734	1.11621
1.97985	1.82357	1.83172	1.96918	1.81944	1.95397	1.39265
1.71388	1.36216	0.966398	1.87046	1.85405	1.86115	0.772716
1.78807	1.48282	1.12425	1.87289	1.94309	1.8715	1.57224
1.71006	1.31296	0.746554	1.91657	1.93406	1.86562	1.50018
1.38125	1.6838	1.1796	1.79275	1.75185	1.90406	1.19395
1.86102	1.65575	1.58139	1.83034	1.89326	1.79214	1.47854
1.84728	1.69494	1.59346	1.82332	1.8199	1.79009	1.49319
1.3683	1.31518	1.00496	1.49287	1.63923	1.54656	1.16196
1.92167	1.77954	1.77767	1.82233	1.93736	1.85179	1.6584
1.52134	1.45355	1.20252	1.39903	1.41211	1.59478	1.83495

## Sheet: EN
PMGI	DenseFuse	FusionGAN	RFN-Nest	swinfuse	U2Fusion	ours
6.79659	6.43518	6.49735	6.64243	7.0345	6.81147	7.61333
7.07646	6.81858	6.39492	7.08154	7.58795	7.16488	7.68108
6.98786	6.5333	6.32011	7.08832	7.32537	6.93645	7.58473
6.73627	6.30728	5.97729	7.0609	7.31006	6.97543	7.48143
7.40175	6.53929	6.48397	7.4783	7.35091	7.48319	7.58957
6.78136	6.09641	5.93325	6.89335	6.72519	7.05249	7.35181
7.05648	7.13583	6.87986	7.16642	6.43727	7.39649	7.58983
6.34951	6.40016	5.8782	6.53677	4.6131	5.95198	6.76657
7.16452	6.53072	6.37578	6.99033	7.22474	7.02342	7.41018
7.03048	6.37152	6.60806	7.01926	7.18416	7.04184	7.00622
6.8016	6.53637	6.77246	6.90441	7.7189	7.1097	7.03378
7.27089	6.18366	6.07732	7.07528	7.0379	6.92619	7.33011
6.66671	5.40238	6.16411	6.27091	6.46086	6.35824	7.40063
6.98614	7.1169	6.75701	7.07508	6.6335	7.06508	7.17644
6.9932	6.50277	6.74054	7.03327	6.86668	7.11816	7.58468
6.45734	6.32038	5.97582	6.55073	7.26064	6.97635	7.33559
7.18483	6.52806	6.72185	6.99883	6.86286	7.06336	7.5765
6.56568	6.31138	6.01832	6.54382	7.07751	6.95491	7.41132
7.25676	6.47943	7.0254	7.27048	7.6405	7.16264	7.36269
6.95504	6.55949	7.01407	6.94716	7.65625	7.18284	7.26697
7.02226	6.70063	6.44936	7.02517	7.53521	7.11253	7.67128
7.50364	6.68579	7.12	7.53971	7.37522	7.58608	7.67383
7.54567	6.48349	7.08463	7.49467	7.25423	7.59168	7.75749
7.50892	6.51669	7.39654	7.50233	7.66949	7.56385	7.68958
7.61299	6.55942	7.33952	7.43893	7.50945	7.42617	7.55505
7.19409	6.40215	7.09301	7.05469	7.58209	7.18471	7.49062
7.4449	6.58382	7.00358	7.4977	7.54513	7.57606	7.6708
6.8395	5.47229	6.12326	6.59196	6.4127	6.75144	7.34637
6.79988	5.39522	6.26185	6.55681	6.80991	6.19592	7.46401
7.15315	6.65871	6.52974	7.07004	7.48846	6.98143	7.47699
6.88138	5.511	6.25739	6.73866	6.77792	6.98732	7.6331
7.27594	7.18723	7.30556	7.35841	6.13941	7.23155	7.62336
7.37271	6.42045	6.99683	7.19718	6.63663	7.23986	7.72854
7.1527	5.7757	6.74562	7.21283	7.23586	7.03951	7.62395
6.98818	6.25721	6.59263	6.84227	6.88394	6.98799	7.34588
6.65385	5.67404	5.53312	6.76621	7.02553	6.59627	7.42343
6.71297	4.85634	6.3878	6.42054	6.36197	6.40952	7.4653
6.93832	6.53893	6.52047	6.9501	7.4823	6.98547	7.56532
7.13963	6.75307	6.84891	7.08983	7.42856	7.1135	7.68095
7.03272	6.91335	6.48366	7.11557	7.39899	7.37284	7.69974
6.79881	6.15994	6.74239	6.5205	6.8466	6.64126	7.49256
6.6652	5.91466	6.00553	5.84161	4.64565	5.52976	6.65117

## Sheet: Qabf
PMGI	DenseFuse	FusionGAN	RFN-Nest	swinfuse	U2Fusion	ours
0.380056	0.329449	0.230699	0.329297	0.465764	0.450366	0.256281
0.367369	0.321913	0.173195	0.273774	0.489681	0.440784	0.358333
0.460843	0.352411	0.214465	0.406288	0.603197	0.520456	0.263501
0.567526	0.392798	0.241724	0.50009	0.689604	0.601332	0.319647
0.509958	0.35849	0.219857	0.532098	0.597555	0.519391	0.61471
0.335801	0.284388	0.132519	0.441782	0.367854	0.343414	0.48249
0.436359	0.377017	0.203634	0.196003	0.435165	0.500862	0.38659
0.539909	0.633862	0.315609	0.49653	0.370914	0.539581	0.677141
0.382035	0.300565	0.304991	0.322719	0.388789	0.430317	0.174673
0.369847	0.292105	0.253323	0.254812	0.352946	0.410701	0.435715
0.349436	0.339754	0.269393	0.357148	0.3508	0.403644	0.448685
0.436441	0.39759	0.233359	0.530992	0.520721	0.493702	0.353884
0.335467	0.304997	0.279571	0.368034	0.353972	0.338134	0.180092
0.459319	0.437311	0.207497	0.242461	0.371663	0.436086	0.470658
0.393601	0.311152	0.173557	0.265073	0.314194	0.361373	0.453458
0.361613	0.328573	0.13474	0.279607	0.393611	0.417268	0.51234
0.409804	0.323918	0.170698	0.261792	0.322547	0.397719	0.44575
0.376383	0.326298	0.147108	0.29593	0.444944	0.438069	0.539656
0.396365	0.330241	0.261186	0.322668	0.344182	0.452815	0.399875
0.435297	0.348194	0.29143	0.272009	0.417787	0.463027	0.371647
0.353757	0.292636	0.166056	0.331356	0.525718	0.469591	0.325669
0.432966	0.342287	0.269659	0.307163	0.36143	0.419516	0.359383
0.442683	0.313538	0.273277	0.345517	0.378497	0.374079	0.344911
0.461029	0.346314	0.311171	0.385761	0.405841	0.38936	0.364431
0.502063	0.353017	0.301342	0.358977	0.419325	0.449173	0.384895
0.407841	0.332	0.260152	0.264837	0.353958	0.463957	0.377669
0.452967	0.341558	0.270817	0.325725	0.383826	0.404831	0.351913
0.435726	0.337309	0.18199	0.243736	0.389053	0.39871	0.409564
0.3459	0.325805	0.241106	0.295373	0.373705	0.357483	0.202675
0.335995	0.295087	0.253458	0.293618	0.370925	0.381449	0.294999
0.422899	0.339273	0.190627	0.28582	0.425427	0.331917	0.195641
0.493855	0.4112	0.247717	0.244992	0.436821	0.515896	0.468788
0.462866	0.319301	0.293676	0.344184	0.293102	0.393936	0.375873
0.321529	0.418479	0.273571	0.356978	0.390688	0.316069	0.21476
0.391902	0.335673	0.238515	0.384447	0.399551	0.390667	0.485599
0.401743	0.378219	0.15675	0.386979	0.413069	0.367407	0.21955
0.333397	0.394846	0.365291	0.385321	0.317498	0.306992	0.213559
0.375116	0.320419	0.233345	0.368069	0.473617	0.45606	0.239704
0.391396	0.335566	0.22942	0.383888	0.483277	0.470063	0.319606
0.345384	0.326553	0.16743	0.284988	0.427022	0.430553	0.277632
0.403449	0.335233	0.22028	0.314615	0.401732	0.454214	0.41345
0.488407	0.363008	0.240941	0.212895	0.276081	0.418639	0.575027

## Sheet: SF
PMGI	DenseFuse	FusionGAN	RFN-Nest	swinfuse	U2Fusion	ours
7.83986	6.5878	6.33318	5.76602	13.6926	10.1646	26.8114
10.7227	8.49997	7.31767	6.45954	19.202	13.4611	22.4374
9.94308	7.14755	6.90613	6.80041	14.3343	11.4965	24.9047
11.1969	7.51641	7.33142	7.46842	15.4242	13.5839	22.949
20.3577	12.1427	11.4217	14.9457	26.3199	24.7192	21.9174
10.3714	6.99078	5.01238	8.15706	12.1932	15.6396	14.2908
10.1078	9.49719	6.82137	5.8724	23.3396	13.4539	15.872
17.1466	15.4857	9.9548	11.8241	19.1342	20.3506	19.0911
9.64216	7.27201	7.7445	6.81841	13.9049	13.8289	28.0312
12.3623	10.928	12.0226	7.96798	21.1598	17.5884	16.8998
8.10994	6.39186	7.3024	6.06832	15.8329	11.439	10.5136
6.19793	3.36099	3.3056	5.69409	7.24185	7.79393	12.8116
10.5603	5.45674	7.15353	6.06031	11.5429	11.4805	22.1516
7.23214	6.47726	4.57094	3.60347	9.67961	9.26702	8.43934
8.42241	5.70844	4.12145	4.04275	8.77636	9.32927	9.85098
8.05308	7.411	4.59208	5.04294	12.781	11.0257	14.432
7.60627	5.25051	4.39796	4.62313	10.2649	9.46051	10.1734
7.32413	6.3214	4.67329	5.00103	12.0992	10.4594	13.8898
4.59401	4.01391	4.68689	3.84729	9.85656	8.0802	8.28434
5.19053	4.26414	5.43146	3.48491	10.502	7.62602	8.82616
9.87226	7.44031	6.96655	6.28512	14.8434	12.5378	23.4884
5.57631	3.98835	5.27615	3.70532	8.9322	9.21518	8.01675
5.91526	4.07405	5.46459	4.69206	9.52707	10.8494	10.5858
6.52587	4.05708	6.28874	4.98982	8.93927	10.3653	8.77395
8.03879	4.95141	6.98501	5.87895	11.1569	11.4627	10.3154
4.75553	4.05267	5.15165	3.47464	11.2456	8.34608	8.76539
5.91903	4.14903	5.25895	4.12549	9.24373	10.0192	8.05728
5.05463	3.21256	2.76802	3.29633	6.63052	8.93589	7.96416
4.83961	3.72976	4.09809	3.57213	9.67574	9.25885	25.6503
7.49961	6.69794	7.16419	5.36996	14.8945	11.0981	18.7314
7.75884	4.29576	3.91542	4.5959	10.5018	13.8822	27.1504
10.1815	8.08391	8.05019	5.84604	15.3899	12.2593	11.7055
4.95246	3.3306	4.22413	3.67091	6.93594	7.98017	9.14499
12.2184	4.79693	7.68215	6.7689	14.2366	14.3038	36.9947
9.90022	7.0495	6.41346	7.03732	13.0239	13.4349	13.3831
9.12501	5.07249	3.92655	4.57067	12.3123	11.5439	22.7965
9.3459	3.08367	7.10001	5.8146	9.19783	10.1812	23.7737
7.77686	6.13501	6.24653	5.5076	12.9941	10.0482	21.8763
10.0573	7.98233	7.66092	7.73317	16.4486	12.4105	26.1026
9.03788	7.22816	5.98496	5.58714	16.0886	12.0581	25.2541
12.6814	11.1014	10.1117	9.91912	18.6049	18.3692	31.9752
8.21044	6.63092	5.7223	4.73856	12.3146	9.46964	13.6764
